# Supplementary material for: Downstream ecosystem responses to middle reach regulation of river dischargein the Heihe River Basin, China
Source: Copernicus journal article supplement (doi:10.5194/hess-20-4469-2016), 2016-11-07
Supplement: Supplementary file 1 [file hess-20-4469-2016-supplement.pdf]

Supplement of Hydrol. Earth Syst. Sci., 20, 4469–4481, 2016  
<http://www.hydrol-earth-syst-sci.net/20/4469/2016/>  
doi:10.5194/hess-20-4469-2016-supplement  
© Author(s) 2016. CC Attribution 3.0 License.

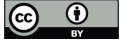

*Supplement of*

## **Downstream ecosystem responses to middle reach regulation of river discharge in the Heihe River Basin, China**

**Yan Zhao et al.**

*Correspondence to:* Yongping Wei ([yongping.wei@uq.edu.au](mailto:yongping.wei@uq.edu.au))

The copyright of individual parts of the supplement might differ from the CC-BY 3.0 licence.

# Supplementary Materials for “Downstream ecosystem responses to middle reach regulation of river discharge in the Heihe River Basin, China”

## S1. Validation of Landsat derived vegetation and crop distribution maps

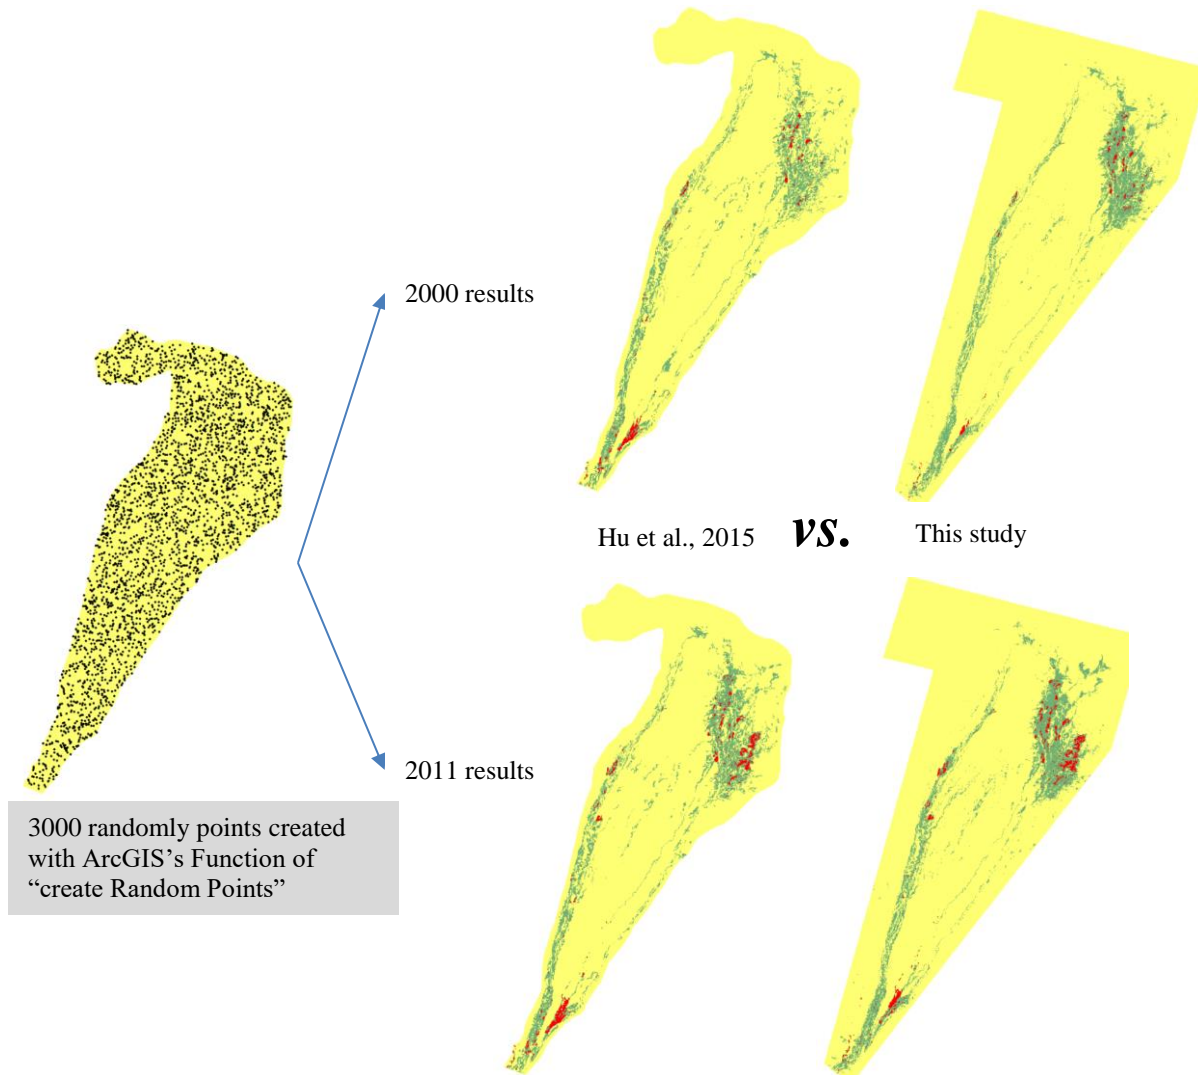

Figure S1: scheme of inter-comparison of Land cover maps between Hu's results and this study. The reference data were provided by Dr. Xiaoli Hu from the Cold and Arid Environmental and Engineering Research Institute of Chinese Academy of Sciences. The origin forest (arboreal forest, shrub forest and sparse forest) and grassland (Thick, moderate and sparse grassland) types were grouped into vegetation while water body, buildup land and desert were grouped into "others" to support the comparison.

Table S1: Confusion matrix and *kappa* coefficients for the inter-comparison of 2000 and 2011 results.

|                       |                 | Crop  | Vegetation | Others | Total | Producer's Accuracy |
|-----------------------|-----------------|-------|------------|--------|-------|---------------------|
| 2000                  | Crop            | 24    | 11         | 3      | 38    | 63.2%               |
|                       | Vegetation      | 3     | 272        | 69     | 344   | 79.1%               |
|                       | Others          | 4     | 108        | 2506   | 2618  | 95.7%               |
|                       | Total           | 31    | 391        | 2578   |       |                     |
|                       | User's Accuracy | 77.4% | 69.6%      | 97.2%  |       |                     |
| <i>kappa</i> = 0.7206 |                 |       |            |        |       |                     |
| 2011                  | Crop            | 40    | 15         | 1      | 56    | 71.4%               |
|                       | Vegetation      | 5     | 273        | 92     | 370   | 73.8%               |
|                       | Others          | 4     | 138        | 2432   | 2574  | 94.5%               |
|                       | Total           | 49    | 426        | 2525   |       |                     |
|                       | User's Accuracy | 81.6% | 64.1%      | 96.3%  |       |                     |
| <i>kappa</i> = 0.6731 |                 |       |            |        |       |                     |

## S2. Groundwater variations in Ejina region

We collected groundwater observation data from the WestDC database in which groundwater levels were measured at 50 m, 300 m, 2,200 m, 2,700 m, 3,200 m and 4,300 m away from the river channel along a transection located in the study area as shown in the following figure.

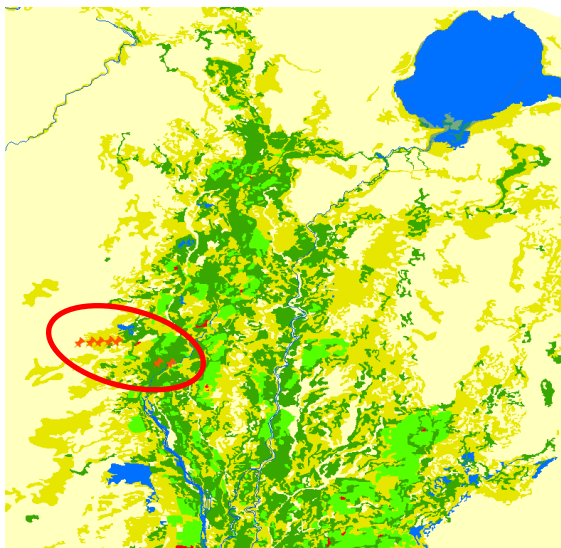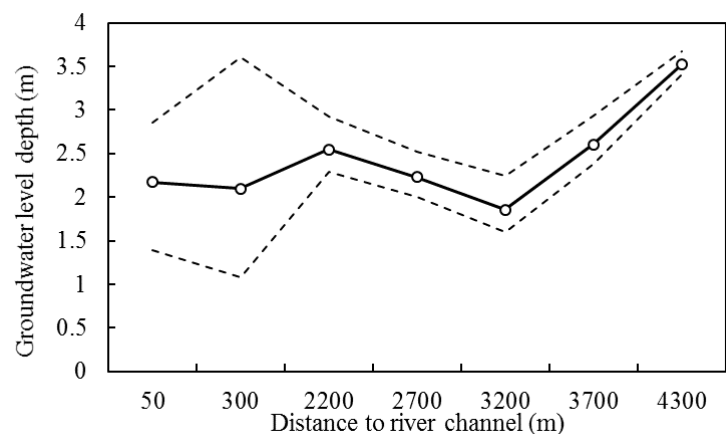

Figure S2: Groundwater variations along a transection (left panel within the red cycle) in Ejina Oasis. Solid line with circles indicates mean levels, dash lines indicate minimum and maximum water levels.
